# Supplementary material for: Identifying Changes in Selective Constraints: Host Shifts in Influenza
Source: PubMed Central journal article supplement (PMC2770840; doi:10.1371/journal.pcbi.1000564), 2009-11-13
Supplement: pcbi.1000564.s009.pdf [file pcbi.1000564.s009.pdf]

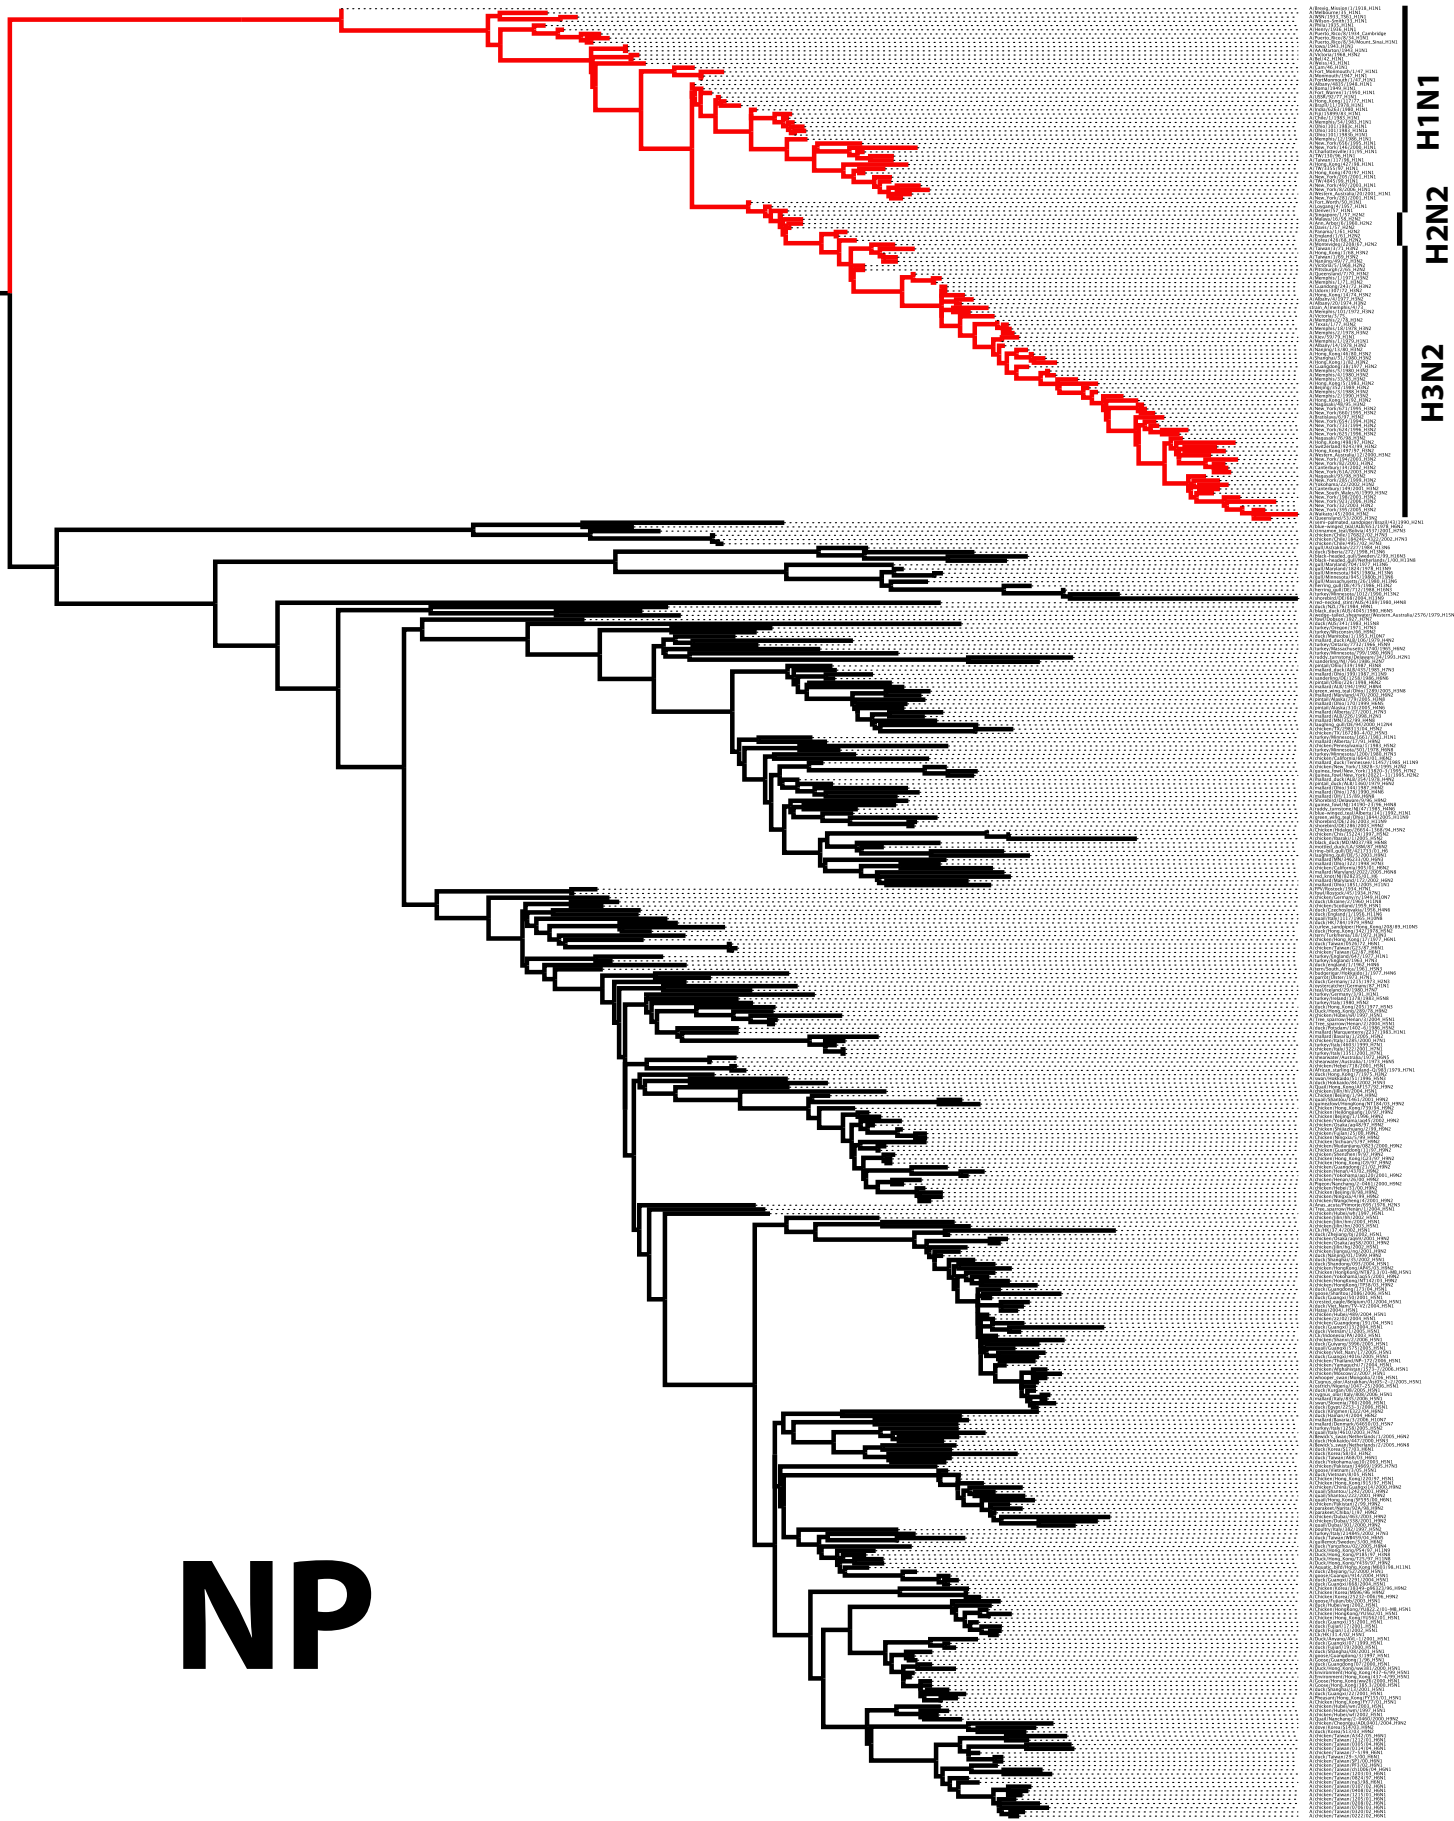

**NP**

0.1

H3N2 H2N2 H1N1
