# Supplementary material for: Identifying Changes in Selective Constraints: Host Shifts in Influenza
Source: PLOS journal article supplement (doi:10.1371/journal.pcbi.1000564), 2009-11-12
Supplement: S5 (10.1371/journal.pcbi.1000564.s005) [file journal.pcbi.1000564.s005]

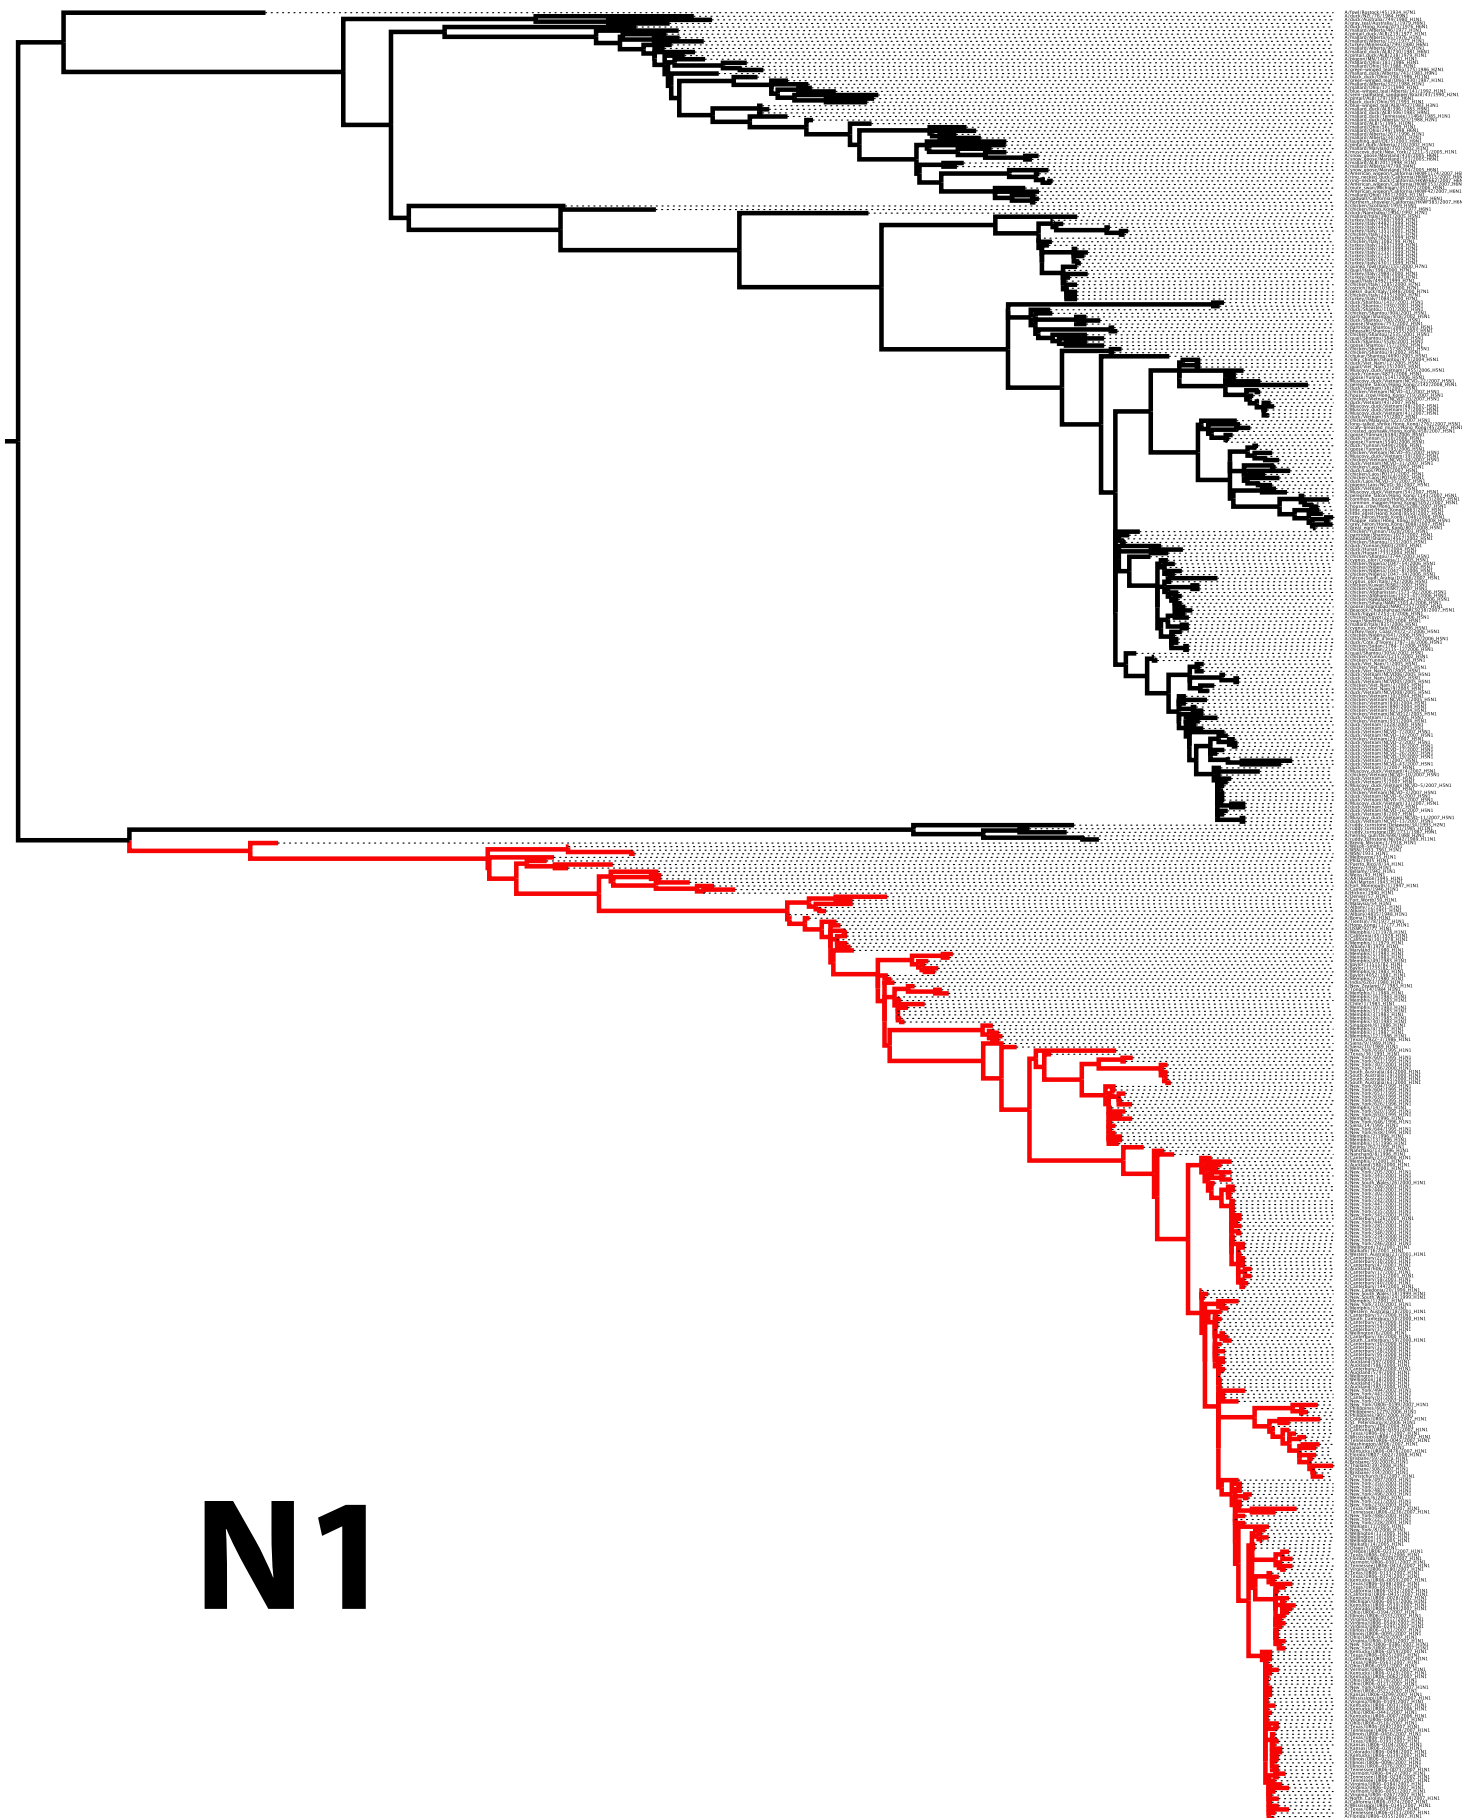

N1

0.1
