# Supplementary material for: Identifying Changes in Selective Constraints: Host Shifts in Influenza
Source: PLOS journal article supplement (doi:10.1371/journal.pcbi.1000564), 2009-11-12

PA

0.1

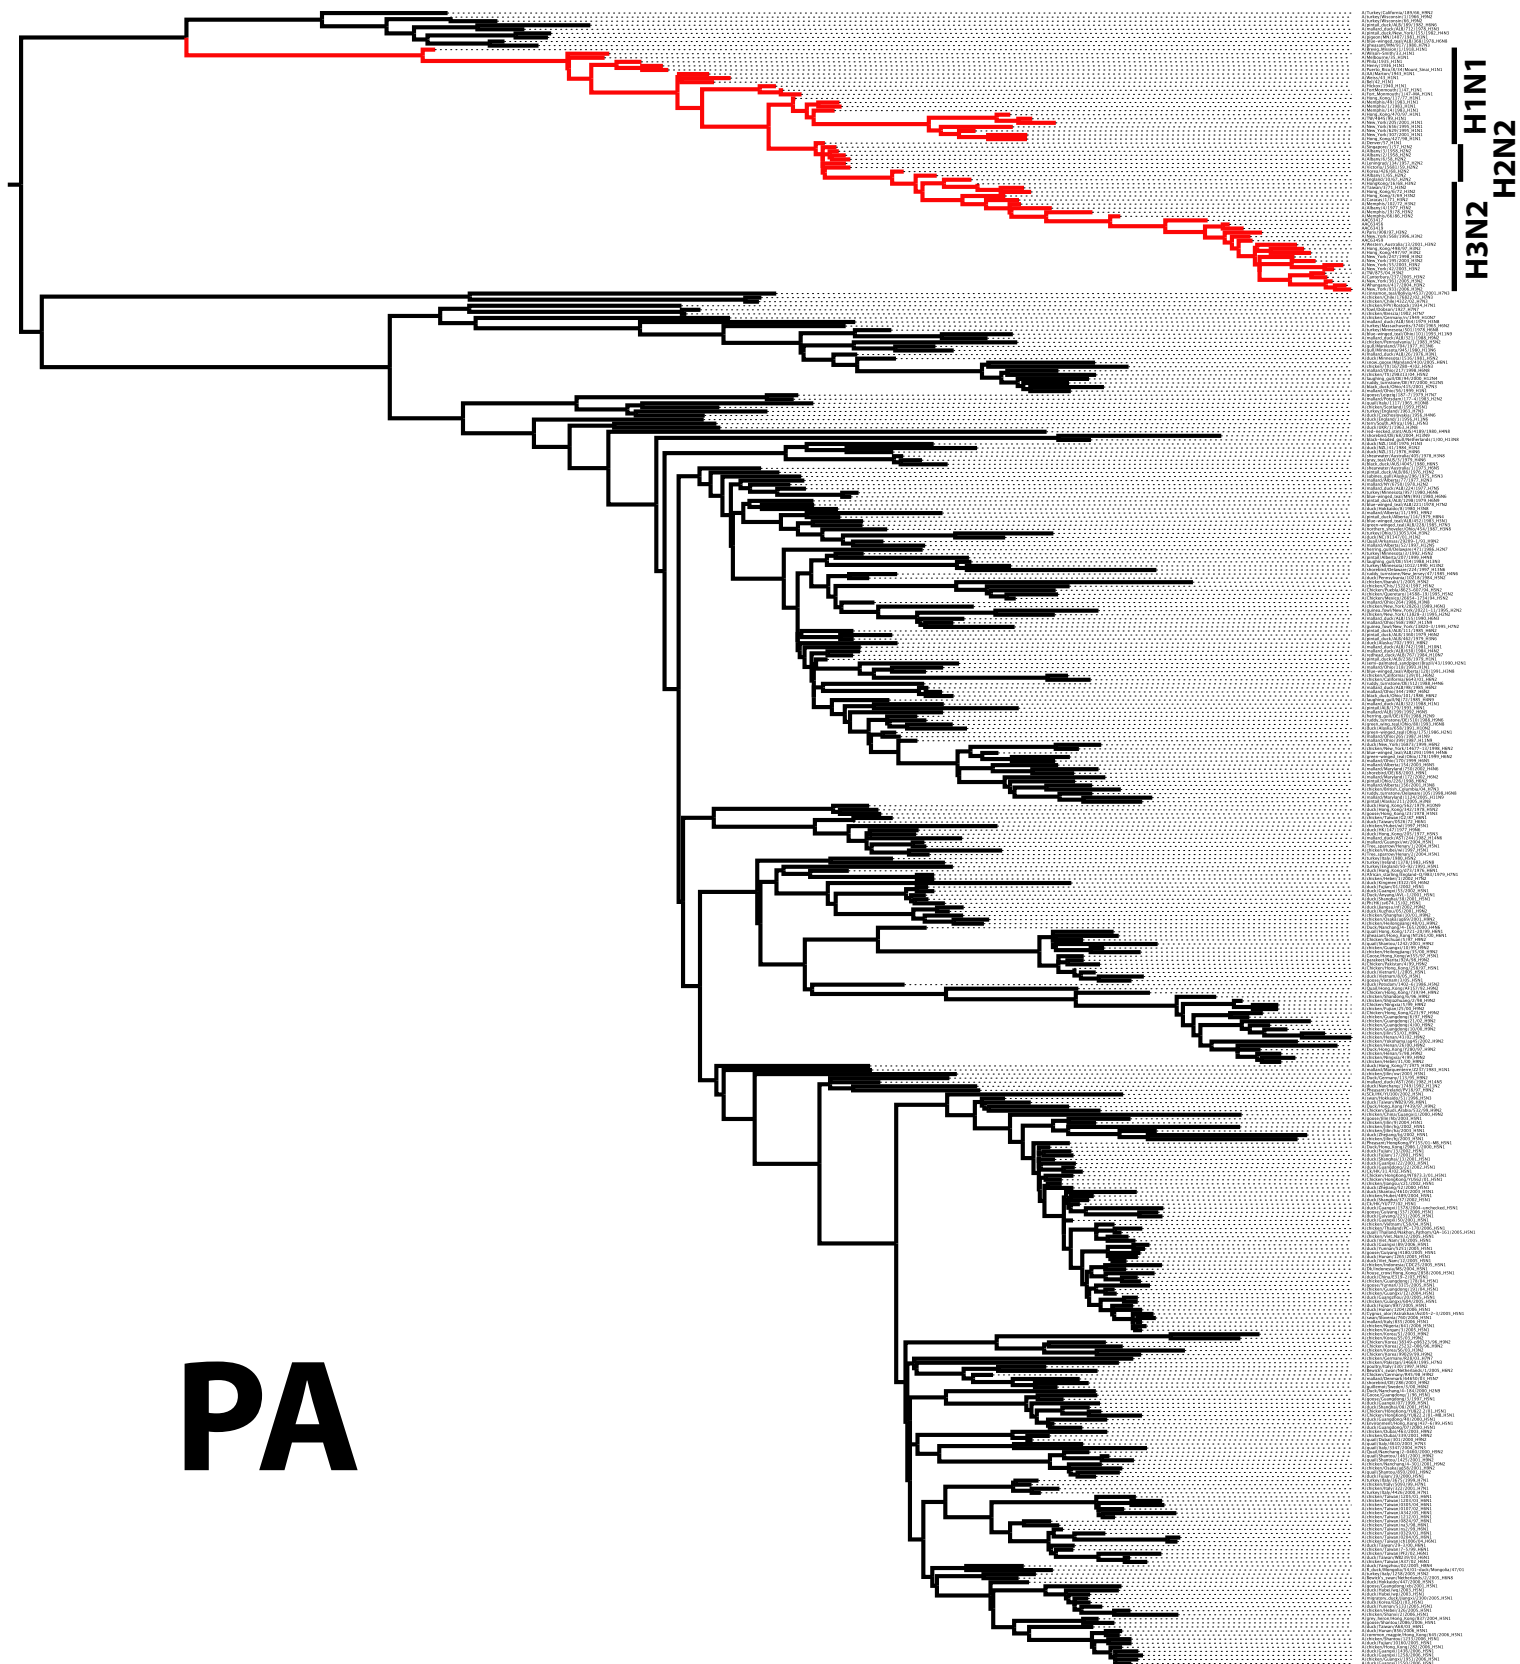

Supplement: S10 (10.1371/journal.pcbi.1000564.s010) [file journal.pcbi.1000564.s010]
