# Supplementary material for: Identifying Changes in Selective Constraints: Host Shifts in Influenza
Source: PLoS Comput Biol. 2009 Nov 13;5(11):e1000564. doi: 10.1371/journal.pcbi.1000564 (PMC2770840; doi:10.1371/journal.pcbi.1000564)
Supplement: Table S1 — Sites identified as undergoing changes in selective pressure with a false discovery rate of 0.20. Position: Sites in H1, H2, and H3 are identified with respect to their H3 positions. Sites in N1 and N2 are identified with respect to their own indices. P: P value using LRT for non-homogeneous model (Model 2) compared with homogeneous model (Model 3). delta: Minimum FDR value required for this site to be identified. This should not be equated with the probability that this identification is a false positive. Residues Identities: Residue identity is shown unadorned if its equilibrium frequency is greater than 0.5, in single parentheses if its equilibrium frequency is between 0.1 and 0.5, and in double parentheses if its equilibrium frequency is between 0.01 and 0.1. Residues with equilibrium frequencies below 0.01 are not listed. Selective constraints represent the strength of the selective pressure in the two different hosts as defined in Equation 5 in the text. Highlighted locations are significant with a false discovery rate of 0.05. (0.11 MB XLS) [file pcbi.1000564.s001.xls]

## Sheet: Data 0.20
Protein	Location	P	delta	Avian residues	Human residues	Avian selective constraint strength (d)	Human selective constraint strength (d)
H1	-5	0.000305095	0.00259331	E	K	2.73753	2.85161
H1	2	5.08717e-05	0.000786199	F	L	3.29826	2.62819
H1	7	0.00157918	0.0103254	V((A))	A	2.59243	2.90517
H1	8	0.00447135	0.0210217	L	T	2.62819	2.70601
H1	15	0.00935762	0.0378761	V((I))	I	2.68151	2.62705
H1	40	0.0811374	0.168212	V(I)	V	2.33707	2.81585
H1	53	0.0697708	0.148454	S	L(R,K)	2.4763	1.86334
H1	54	4.90176e-05	0.000786199	N	K	2.78527	2.88602
H1	63	0.00580383	0.0246663	K	N	2.88603	2.78527
H1	65	0.0234648	0.0653938	N	S((N))	2.78525	2.4041
H1	70	0.00519113	0.0232235	L	I((V))	2.62819	2.57375
H1	77	0.0045753	0.0210217	D	E(G)	3.06596	2.25403
H1	79A	0.0519296	0.120932	L	I(F,V)	2.62817	1.98879
H1	80	0.00185593	0.0111647	T	S((P))	2.73005	2.25698
H1	88	0.0254736	0.0676642	I	V((A,I))	2.65053	2.41637
H1	91	0.00256875	0.0136465	S(T)	P	2.06446	3.12839
H1	93	0.0232384	0.0653938	S	P	2.50126	3.20821
H1	103	0.0242668	0.066272	I	A((T))	2.65703	2.81926
H1	120	0.000769101	0.00568466	K	R	2.86377	2.81598
H1	122	0.0230093	0.0653938	E(V)	E	2.28902	2.73753
H1	125C	0.0421537	0.0995295	N(S)	S((R,N))	2.32221	2.29839
H1	131	0.0222343	0.0653938	E	T((I,N))	2.73747	2.36456
H1	133A	0.0339085	0.0837498	K	I((R,K))	2.88552	2.19223
H1	136	0.0339926	0.0837498	T	S	2.73005	2.50124
H1	138	0.011204	0.0424488	A	S((A))	2.90516	2.2425
H1	140	0.018368	0.0637255	S((P))	S	2.30454	2.47405
H1	141	0.000155068	0.00147931	Y	H	3.50211	4.01152
H1	142	0.021778	0.0653938	L(S,H)((A))	N((R,E,S,K))	1.76223	1.78356
H1	144	0.0193914	0.0653938	A(G)	(E,K)((R))	2.39569	1.9183
H1	154	4.62197e-05	0.000786199	I((L))	L	2.50711	2.62819
H1	155	1.01204e-05	0.000741565	T(I)	T	2.19587	2.72956
H1	156	0.0245596	0.066272	K((E))	(E,R,G,K)	2.74219	1.39967
H1	158	0.0664997	0.146309	G	N((E,G,D))	2.60038	2.39251
H1	159	0.000156633	0.00147931	N(T)	G((S))	2.41388	2.49386
H1	160	0.0114861	0.0424488	S	L((S))	2.50123	2.40735
H1	163	0.000189452	0.00169509	K	N((T,S))	2.88603	2.52253
H1	164	0.0230573	0.0653938	L(I)	L	2.16847	2.62819
H1	167	0.0230288	0.0653938	S(T)	S	2.07648	2.50124
H1	173	0.0638056	0.143087	G((E))	E((G,K))	2.53132	2.3059
H1	187	0.00346874	0.0173437	T((N))	N((S))	2.60832	2.70687
H1	188	4.1562e-05	0.000786199	T((V,A))	I((S,T,M))	2.22781	2.19544
H1	189	0.000383505	0.00296345	S(G)((D,N))	G(K,R)((T,E,D))	1.64408	1.36405
H1	190	1.7582e-09	2.98895e-07	E	D(V)((N))	2.73733	2.19513
H1	192	0.0121027	0.0437757	Q	(K,M,R)	3.34048	1.97718
H1	193	0.00409893	0.0199091	N(E)((T,S))	(A,T,N)	1.80382	1.84372
H1	196	0.0698609	0.148454	Q	H(S,R)((Y,Q))	3.34054	2.57985
H1	197	0.00562483	0.0245185	N	T(K)	2.78526	2.15176
H1	198	0.000323193	0.00261632	T((V,A))	E((G,V))	2.28196	2.4734
H1	199	0.0536778	0.123314	N((D))	N	2.51581	2.72834
H1	205	0.0810085	0.168212	G	V((L))	2.60038	2.68201
H1	210	0.0231135	0.0653938	N	S	2.78499	2.50124
H1	214	0.0111125	0.0424488	T((N))	T	2.49178	2.69729
H1	217	0.0230699	0.0653938	I(L)	I	2.18688	2.65702
H1	219	0.0390622	0.0935293	A	K((E,R))	2.90518	2.62396
H1	222	0.00245652	0.0134712	K((R))	K	2.62263	2.88603
H1	225	6.45625e-05	0.000914635	G	D((G,N))	2.60039	2.83085
H1	227	0.0364298	0.0884724	A	E(P,H)	2.90491	2.11425
H1	230	0.0302161	0.0778294	M(I)	I((M))	2.85066	2.58969
H1	238	1.82493e-05	0.000741565	D	E	3.06596	2.69664
H1	239	4.89589e-05	0.000786199	Q	P	3.3405	3.21163
H1	244	0.00149928	0.0101951	T	I((M))	2.73005	2.56255
H1	248	0.00207729	0.0117713	T	N((S))	2.73006	2.6662
H1	255	0.0639683	0.143087	W	R(M)	3.95012	2.47261
H1	261	0.00120552	0.00853907	N	S((N))	2.78525	2.44822
H1	262	0.000145969	0.00147931	K	R	2.88603	2.81527
H1	264	0.0180889	0.0637255	S	F(P)((L))	2.5012	2.75488
H1	265	0.0671302	0.146309	G(D)((E))	G((E))	1.91843	2.49667
H1	271A	0.000155068	0.00147931	D	N	3.06596	2.78528
H1	272	0.00298	0.0153515	A(T,V)	A	1.96907	2.87041
H1	274	2.18107e-05	0.000741565	V((I))	M	2.72869	3.42179
H1	275	0.0230741	0.0653938	H	D(G)((N))	4.01142	2.26237
H1	279	0.0112965	0.0424488	T	A((S))	2.73006	2.76512
H1	280	0.00190457	0.0111647	R(K)	K	2.17566	2.88603
H1	285	1.47966e-05	0.000741565	H((Y,R))	Q	3.59732	3.19601
H1	288	4.89878e-05	0.000786199	L	I	2.62819	2.65702
H1	300	7.60606e-05	0.000994639	I	V	2.65703	2.78571
H1	309	0.00176028	0.0110833	V(I)	V	2.48983	2.80135
H1	310	0.000125593	0.00147931	K	R	2.88603	2.80126
H1	311	0.0231384	0.0653938	S(T)	S	2.07653	2.50124
H1	312	0.0324185	0.0822558	T(V)	A(T)	2.27775	2.13351
H1	317	0.0292591	0.0765239	A	V((A))	2.90517	2.53955
H1	323	0.00895272	0.037121	V	I	2.83321	2.6057
H1(2)	46	0.0483425	0.161142	D	N(D)	3.06596	2.42654
H1(2)	72	0.00332485	0.0332485	N	K	2.78527	2.88517
H1(2)	77	0.000208432	0.00416863	I	M	2.65706	3.46571
H1(2)	91	0.0233894	0.116947	V	I((V))	2.83321	2.51984
H1(2)	110	0.00638471	0.0510777	F(L)	F	2.70778	3.2728
H1(2)	116	0.000207426	0.00416863	R	K	2.83197	2.88603
H1(2)	123	0.00864488	0.0576325	R(K)	K	2.19399	2.85995
H1(2)	127	0.000798575	0.0106477	R	K	2.83197	2.88603
H1(2)	172	0.011158	0.06376	E	K((R))	2.73753	2.7548
H1(2)	198	0.0329895	0.120181	V(I)	V	2.33704	2.83321
H1(2)	199	0.0330497	0.120181	L(W)	L	2.39603	2.62824
H1(2)	205	0.0279907	0.120181	I((L))	I	2.40319	2.65702
H2	9	0.0352938	0.147058	(E,K,R)	R	1.80706	2.83147
H2	80	0.0034753	0.069506	(S,K,N,T)	R((K))	1.38082	2.71892
H2	94	0.00920595	0.0836905	N(H)	Y(D)((N))	2.54075	2.79799
H2	95	0.0234554	0.116091	G	S	2.60037	2.50123
H2	116	0.0143099	0.102214	T((R,K))	K	2.25863	2.78565
H2	121	0.0259	0.117727	I(V)	V	2.04935	2.83321
H2	122	0.00332772	0.069506	K((R))	R(K)	2.76747	2.33251
H2	125A	0.00673589	0.0826992	R((K))	K((R))	2.5681	2.73768
H2	126	0.0425118	0.157451	Q(R,E)	G(R)	2.06757	2.14661
H2	131	0.0233472	0.116091	T	E(K)((T))	2.72956	2.06967
H2	137	0.0101627	0.0846891	Q(R)	M(K,R)	2.62829	2.37393
H2	144	0.0399597	0.154395	N(G)((K))	E(K)	1.85592	2.12257
H2	152	0.0341878	0.147058	V	I	2.83321	2.65703
H2	159	0.023421	0.116091	S	P	2.50126	3.2113
H2	182	0.00643223	0.0826992	I(V)	V	2.11327	2.83321
H2	186	0.000531922	0.0177307	N	I(N)((K))	2.78477	1.95488
H2	197	0.000361992	0.0177307	N	E(K,N)	2.78477	2.01059
H2	204	0.0241553	0.116091	V	A	2.83322	2.90474
H2	205	0.000110588	0.0110588	G	S(V)	2.59988	1.96267
H2	216	0.0243791	0.116091	E	K(D)	2.73686	2.31049
H2	219	0.0230464	0.116091	T	A	2.73007	2.90517
H2	226	0.00701788	0.0826992	Q	L((Q))	3.34047	2.44776
H2	228	0.0136627	0.102214	G	S(G)	2.60037	2.1258
H2	252	0.0230464	0.116091	I	V	2.65703	2.83321
H2	275	0.00826992	0.0826992	E(D)	G(E)	2.43167	2.05993
H2	297	0.0401427	0.154395	I(V)	V	2.25955	2.83321
H2	313	0.00816987	0.0826992	R(K)	K	2.35364	2.88603
H2(2)	45	0.0053605	0.0423718	I(V)	F	2.2847	3.29826
H2(2)	130	0.00537545	0.0423718	A	V((A))	2.90517	2.57349
H2(2)	169	0.00546733	0.0423718	N	K	2.78527	2.886
H2(2)	180	0.00211494	0.0423718	N((S))	S	2.6307	2.50124
H2(2)	202	0.0178604	0.110735	I((M))	M(V,I)	2.44599	2.13212
H3	-14	0.0226381	0.120629	K((R))	K	2.57065	2.86218
H3	-13	0.0402038	0.165608	T(A)	T	2.29278	2.71036
H3	-12	0.0296822	0.148411	I(V)	I	2.16169	2.65703
H3	-7	0.002464	0.03696	C(Y)	Y	2.92061	3.43022
H3	-6	0.0451658	0.165608	(I,F,L)	I	1.78499	2.58379
H3	-5	0.00524068	0.0658846	L(F)	S(L)	2.25523	2.01481
H3	-2	0.019741	0.112319	A(V,T)	V(G)((A,T))	2.12185	1.91487
H3	0	5.03566e-05	0.00573132	(G,S,C)	A(T)((S))	1.7897	2.12692
H3	2	0.0585947	0.198914	N(D)	K(E,N)	2.22685	2.19273
H3	3	0.0226636	0.120629	(P,Y,L)((H))	L((T,I,P,F))	1.91495	1.67134
H3	4	0.00212791	0.0351105	S((P))	P(S)	2.29773	2.70152
H3	6	0.0163642	0.102038	N(S)	N((I))	2.26865	2.67116
H3	7	0.0125326	0.0939943	N(G,D)	D	1.821	3.03956
H3	9	0.0385725	0.165608	(N,S,D)	S	1.69522	2.46833
H3	31	0.0166971	0.102038	D((N))	N(S)((D))	2.93054	2.20284
H3	50	0.00365274	0.0502252	K((R))	G(E,R)((K))	2.55833	1.65564
H3	53	0.0158092	0.102038	N	(D,G,N)	2.78528	1.78222
H3	57	0.00114758	0.0282609	K((R))	Q(R)	2.59868	2.72406
H3	62	0.0289332	0.148411	R((I))	(G,E,M)((I,K))	2.66824	1.42872
H3	63	0.000732367	0.0241681	D	N	3.06596	2.78528
H3	67	0.00133984	0.0282609	(I,V,M)	I	1.85668	2.60219
H3	81	0.010456	0.0893682	D((N))	N((D))	2.7534	2.72739
H3	82	0.0424686	0.165608	A(E)	K(E)	2.2737	2.42306
H3	83	0.0434094	0.165608	T	K(E,N)	2.73006	1.88447
H3	92	6.94705e-05	0.00573132	N((S))	K((T,N))	2.49094	2.48338
H3	94	0.010728	0.0893682	F	H(Y)	3.2983	3.21035
H3	121	0.0394249	0.165608	I	(T,N,F)((K))	2.65702	1.59955
H3	126	0.00844474	0.0870864	T	N((D))	2.73006	2.55563
H3	137	0.0108325	0.0893682	G(S)((N))	Y(S,F)	1.83983	2.15106
H3	143	0.0160787	0.102038	P	S	3.21155	2.50126
H3	144	0.0449766	0.165608	A(T)((V))	(D,N,G)((V,A,T,I))	2.17249	1.09977
H3	145	0.00137023	0.0282609	N(R,S)	K(N)((S))	1.9794	1.99633
H3	146	0.0397902	0.165608	G	S(G)	2.60037	2.14652
H3	160	0.00629856	0.0692841	(A,T,R)	K(A)((R))	1.72826	2.26398
H3	163	0.0116793	0.0917663	L(V)	A((V))	2.30977	2.62319
H3	190	0.00559021	0.0658846	E	D	2.73754	3.05867
H3	192	0.03115	0.151169	T	I(T)	2.73005	2.03716
H3	196	0.0439893	0.165608	V((I))	A(V)((I))	2.68256	2.27598
H3	213	0.000117386	0.00645621	I	V	2.65689	2.83321
H3	214	0.0546012	0.191685	I	T((I))	2.65703	2.67082
H3	222	0.0353899	0.165608	W	R	3.95012	2.83151
H3	228	0.00055946	0.0230777	G	S	2.60037	2.50123
H3	244	0.00177362	0.0325164	V	L((I))	2.8332	2.41557
H3	248	0.0424661	0.165608	N	T((S))	2.78526	2.43104
H3	269	0.014047	0.100772	R(K)	R((K))	2.16619	2.76282
H3	275	0.00954479	0.0893682	D	G(D)((S))	3.06595	2.021
H3	307	0.0590716	0.198914	K	R(K)	2.88603	2.38096
H3	312	0.0477903	0.171422	(G,N,S)((D))	N((K,T))	1.45808	2.4205
H3	313	0.0192708	0.112319	T(S)	T	2.18171	2.73005
H3(2)	55	0.00833925	0.187633	V	L(I)	2.8332	2.08621
H3(2)	57	0.0234572	0.188238	E	G	2.73752	2.59941
H3(2)	117	0.0179959	0.188238	K((R))	K	2.77373	2.88603
H3(2)	147	0.00426801	0.187633	A(S)	A((T))	2.30739	2.75743
H3(2)	161	0.0127109	0.188238	I(V)	V	2.05121	2.83321
H3(2)	196	0.0250984	0.188238	F(L)	F	2.83156	3.27227
M1	77	0.0182129	0.190294	R((K))	R((I,T))	2.77066	2.66963
M1	101	0.0114742	0.190294	K(R)	R	2.44782	2.79462
M1	115	0.000204917	0.0112705	V	I((V))	2.79166	2.5525
M1	121	0.0113051	0.190294	T(A)	A	2.27091	2.87285
M1	137	0.000130362	0.0112705	T	A((T))	2.70816	2.75614
M1	144	0.0224893	0.190294	F(L)	F((L))	2.31916	3.20621
M1	147	0.0131074	0.190294	V	V(I)	2.83321	2.12872
M1	167	0.0209954	0.190294	T((A,I))	(I,T,A)	2.45223	1.69861
M1	174	0.00106498	0.029287	R	K(R)	2.80166	2.20004
M1	208	0.0194666	0.190294	Q	Q((K))	3.34049	3.2271
M1	222	0.0209842	0.190294	H(Q,R)	P(R,H)	3.07453	2.3686
M1	224	0.0215937	0.190294	S(N)	S	1.94132	2.50124
M1	231	0.000463731	0.0170035	D	(N,D,S)	3.02395	1.69699
M2	10	0.000963077	0.0390046	(L,H,P)	P	2.20141	3.21113
M2	20	0.0300468	0.196666	S(N)	N((S))	1.96002	2.61921
M2	36	0.0172703	0.183856	L	V(M)((L))	2.62773	2.43069
M2	44	0.0125368	0.183856	D((N))	D	2.8815	3.06596
M2	48	0.0193294	0.183856	F	S	3.29825	2.50064
M2	54	0.0234848	0.183856	R((C))	(L,H,T,F)((I,C))	2.75259	1.52432
M2	56	0.00304597	0.0822411	K((R))	(E,K,N,R)	2.66817	1.53325
M2	65	0.0175755	0.183856	T((M,K))	T	2.54952	2.7296
M2	78	0.00827705	0.16761	Q((R,H))	(E,N,K,R)((Q))	3.06672	1.32448
M2	86	0.0249681	0.183856	V((A,I))	A(T)((V))	2.64065	2.34416
M2	92	0.0315638	0.196666	V	V(C)	2.79085	2.50553
M2	93	0.000426457	0.034543	N((Y,I,S))	(S,I,Q)((N))	2.38968	1.48527
M2	96	0.0228541	0.183856	L(K)((M))	A(Q)	2.04331	2.4108
N1	3	0.00596445	0.0403114	P	P((T,S))	3.21107	3.03635
N1	5	0.0773824	0.17124	Q((R))	Q	3.27188	3.34048
N1	8	0.0149936	0.0753523	I(T)((V))	I	2.24353	2.62859
N1	12	0.0984296	0.194871	S(Y)	S	2.25439	2.50127
N1	13	0.00990933	0.0554922	I(V,T)	I	1.91473	2.63302
N1	14	0.0164875	0.0788183	C	S	3.69086	2.50115
N1	16	0.0231851	0.0927405	V(A)((T,I))	A(T)((V))	1.99187	2.1547
N1	20	0.0454513	0.128473	V(I)	I((L))	2.17786	2.50482
N1	26	0.075018	0.170971	(T,I,L)((V))	I	1.51146	2.64583
N1	29	0.00725426	0.0430859	M(I)	I	2.80911	2.64137
N1	34	0.00403037	0.0310675	V((G,I,A))	(I,V,A)	2.35773	1.70677
N1	40	0.0465388	0.128473	T	T	2.68101	2.64286
N1	41	0.046284	0.128473	G((E,R))	G	2.44196	2.56233
N1	42	0.00342777	0.0279935	(G,N)((S,D))	S((N))	1.62945	2.34799
N1	43	0.0906958	0.18712	Q((L,R))	Q	3.00545	3.33995
N1	46	0.00195847	0.0174482	(A,P,V,T,S)	T	1.34866	2.71996
N1	47	0.00434338	0.0310675	E(G)((D))	G	1.92217	2.58851
N1	51	0.038635	0.11832	Q((P))	Q	3.23748	3.29406
N1	52	0.00141578	0.0132139	S	R((G,N,K))	2.50122	2.50684
N1	53	0.0602189	0.155301	V(I)	I((S))	2.12041	2.42128
N1	59	0.00207572	0.0176888	N((K))	S((N,R))	2.64906	2.1925
N1	64	0.0670412	0.162601	Q	H(N)	3.34054	3.04408
N1	66	0.0847833	0.181989	Y((F))	Y	3.37683	3.50208
N1	67	0.0066232	0.0430859	(L,I,V)	V	1.62685	2.8327
N1	69	0.0252458	0.0989634	I((V))	I	2.58234	2.65703
N1	70	0.0223017	0.0927405	I(S)((R,N))	N((S))	1.89954	2.44219
N1	71	0.0693593	0.162601	N(V)	N	2.40671	2.78527
N1	72	0.0686274	0.162601	T	T	2.67743	2.73007
N1	74	0.000322907	0.00632898	(L,F,S,V)((I))	V	1.28432	2.81378
N1	75	0.0322677	0.109043	P(A)((L,V,I))	V(I)	1.9763	2.10184
N1	76	0.073763	0.170089	T(A,G)((N,V))	A((V,T))	1.41904	2.6451
N1	78	0.0685251	0.162601	(K,Q,N)	K((E,N,Q))	1.9426	2.5106
N1	79	0.0121416	0.062625	A(T,D)	D((G))	1.99572	2.98242
N1	80	0.000793253	0.00932316	V((R,A,M))	(I,V,K)((T,S))	2.21219	1.31709
N1	81	0.0230296	0.0927405	(A,D,I,T,V)	T	1.27696	2.70544
N1	82	0.0434226	0.125159	P(S)	S	2.19579	2.47061
N1	83	0.0571503	0.151371	(K,A,V,M)((I))	V(M)	1.48079	2.43603
N1	85	0.0338009	0.111627	L(I)	L	2.1381	2.62819
N1	93	0.0995018	0.195023	P	S(P)	3.1689	2.12393
N1	95	0.069592	0.162601	(N,R,S)	S(R)	1.62657	2.04656
N1	99	0.0178384	0.0832459	I(V)	I	2.05203	2.65703
N1	101	0.0164584	0.0788183	S	T	2.50124	2.73005
N1	105	0.0113396	0.060069	S(G)	S((G))	2.00725	2.44265
N1	111	0.0358075	0.113198	K(R)	K	2.18011	2.88603
N1	114	0.0552741	0.148407	V	V((I))	2.83321	2.77145
N1	116	0.0779909	0.17124	V	V	2.78446	2.83322
N1	136	0.0615548	0.155787	Q	Q(K)	3.30314	2.50343
N1	149	0.0299705	0.108339	V((A))	V(F,I)	2.70252	2.04586
N1	157	0.000210672	0.0054715	T	A	2.70779	2.87288
N1	189	3.07934e-08	6.03552e-06	S((G))	G	2.40301	2.59988
N1	195	0.0858912	0.181989	I(V)	I	2.28303	2.65703
N1	200	0.0405464	0.120411	N	N(D)	2.76968	2.25249
N1	206	0.0863519	0.181989	L(V)	L	2.20584	2.62819
N1	210	0.0784903	0.17124	G	G	2.55534	2.60039
N1	211	0.0321082	0.109043	I((M))	I	2.53231	2.65706
N1	214	4.72771e-06	0.000308877	D	E(G)	3.06595	2.14617
N1	220	0.000421699	0.00681585	R((G))	K(R)	2.57069	2.37411
N1	221	0.000452072	0.00681585	N(G)	K	2.40889	2.87362
N1	222	0.0223854	0.0927405	N(D,S)	Q(R)((E,K))	2.07623	2.28537
N1	223	0.0901245	0.18712	I((T))	I	2.5051	2.65653
N1	232	0.0203988	0.0908674	A	V((T,A))	2.85915	2.48175
N1	241	0.0111336	0.060069	V(I)	I	2.16759	2.65703
N1	250	0.0212393	0.0925088	Q	(L,A)((Q,T,P))	3.33892	1.44061
N1	257	0.0341715	0.111627	K(R)	K	2.37362	2.88603
N1	258	0.0379084	0.117937	I(M)	I	2.34039	2.65706
N1	263	0.0296386	0.108339	V	V(I)	2.83321	2.11717
N1	264	0.000808642	0.00932316	(I,A,V)	T	1.7066	2.67687
N1	267	0.0351896	0.113068	V((A))	I((M,V))	2.74205	2.39697
N1	273	0.0786306	0.17124	N	N	2.73538	2.78528
N1	274	2.79513e-05	0.000913074	Y	(S,F)((Y))	3.50153	2.11703
N1	285	0.0192663	0.0878183	A(S)	T	2.48668	2.66704
N1	287	0.030954	0.108339	E(K)	T(I)	2.13155	2.28201
N1	288	0.000584306	0.00818029	I(V)	V	2.08285	2.83321
N1	289	0.00086404	0.00940844	(I,T,M)	M	1.82311	3.46943
N1	309	0.0069518	0.0430859	N(D)	N	2.37218	2.78528
N1	311	2.11811e-05	0.0008303	E((D))	D	2.58793	3.06596
N1	329	0.00722426	0.0430859	N	K(E)((R))	2.78527	2.4295
N1	339	0.00126763	0.0124228	S((L))	T(Y)((N))	2.40483	2.10701
N1	340	1.18391e-05	0.000580118	(L,S,P)((H))	V((A,H,P))	1.54962	2.25535
N1	341	0.000413071	0.00681585	N	D	2.76465	3.05005
N1	351	0.000681588	0.00890609	F((Y))	Y	3.01413	3.4897
N1	354	0.0283464	0.108339	G	D	2.60002	3.06595
N1	355	0.0922466	0.188337	N((K,S))	N((D))	2.65524	2.73135
N1	365	0.00120073	0.0123865	T(I,P)	N((S,T))	2.04653	2.58984
N1	367	0.0619968	0.155787	S	L((I,F))	2.50028	2.30865
N1	369	0.0477006	0.129852	S	K(H)((Q,R))	2.50124	2.42561
N1	382	8.59586e-08	8.42395e-06	E((G,D))	D(N)	2.35404	2.29972
N1	386	0.00879976	0.050728	S(N,E)((R,D))	(R,K,S)((D,N))	1.51584	1.38367
N1	388	0.0296063	0.108339	S((L))	S(L)((F))	2.42466	1.95064
N1	390	0.0593039	0.154981	K	K((R))	2.83899	2.60969
N1	393	0.00434909	0.0310675	I	V(I)	2.63333	2.29617
N1	394	0.0305894	0.108339	V((I))	V	2.76187	2.83321
N1	396	0.0936501	0.189231	I((T))	I(T,V,M)	2.58367	1.60205
N1	427	0.00443822	0.0310675	I	V(I)	2.65703	2.45946
N1	430	0.000223327	0.0054715	R((L))	L((Q,R))	2.5885	2.29788
N1	432	0.0422559	0.123614	K(Q)((E))	(R,E,K)	2.32028	1.77502
N1	434	0.0399497	0.120411	(G,N,S,E)((K))	N((G,E,R,T))	1.15678	1.79562
N1	451	0.0952788	0.190558	S(G)	G(S)	2.16096	2.10655
N1	454	0.0696862	0.162601	V((I))	A(V)	2.53045	2.51072
N1	455	0.000259689	0.00565545	G(S,D)	N(D)	1.64777	2.47438
N2	7	0.0523509	0.12517	I((T))	I	2.59189	2.65703
N2	9	0.0243137	0.0873036	T(A)	T	2.12452	2.73007
N2	19	0.0796733	0.158566	I(T)((A,S))	T((I,A))	1.7731	2.41159
N2	22	0.0231709	0.0855219	L(F)	F	2.26319	3.27042
N2	24	0.0729958	0.149678	M	M((T))	3.45415	3.28631
N2	26	0.0477772	0.124686	I	T	2.65693	2.73005
N2	28	0.00910263	0.05528	L(I)	I((V))	1.95628	2.35448
N2	31	0.0115541	0.0566103	T(M)	T((I))	2.37083	2.62533
N2	33	0.0122702	0.0566103	V(M,I)	V	2.07689	2.83274
N2	38	0.084437	0.163245	K((R,N))	K	2.35299	2.86001
N2	39	0.0479091	0.124686	Q(P,H)	Q	2.40854	3.3199
N2	40	0.0319074	0.0990001	(N,T,S)((H))	Y(C,H)	1.55394	2.70417
N2	41	0.0015814	0.0246941	E((G))	E	2.42883	2.73752
N2	42	0.0451362	0.124278	C	F(Y)	3.65654	2.90048
N2	44	0.00826166	0.05528	(I,P,T,N)((K,V,S))	(P,V,I)	1.1875	1.8103
N2	45	0.0429726	0.124278	(P,L,S)((T))	P((L))	1.60224	3.05396
N2	48	0.0719494	0.149678	N(S)((D))	N	1.87248	2.78477
N2	50	0.00411786	0.0394434	V(A)((T,I))	V((A))	1.97886	2.68675
N2	51	0.00053626	0.0120956	V((M,T))	M	2.38852	3.43332
N2	52	0.0707559	0.149678	P	L(P)	3.2116	2.18631
N2	57	0.0121404	0.0566103	I(T)((V))	I((T))	2.12695	2.55933
N2	58	0.0815747	0.160733	I((V))	I((L))	2.44816	2.58571
N2	59	0.0490287	0.12517	E((K))	E	2.67085	2.73753
N2	60	0.00578734	0.0469932	R(K)	R	2.30027	2.83197
N2	62	0.00428089	0.0394434	(I,T,M)((V))	I((T))	1.58699	2.5855
N2	66	0.0462607	0.124278	V((I))	V	2.75906	2.83321
N2	69	0.00990942	0.05528	N	T(A)	2.78526	2.33168
N2	70	0.000181571	0.00614316	S(H,N)	N	1.95546	2.78481
N2	72	0.00209787	0.0266168	T(I)((V))	T	1.99809	2.70412
N2	73	0.0461558	0.124278	(L,T,I)	I	1.58742	2.65653
N2	77	0.00204952	0.0266168	(I,K,T)((V,L))	I((K))	1.35634	2.32477
N2	79	0.0118512	0.0566103	(P,L)((S))	P	1.96335	3.21107
N2	81	0.000283296	0.00821559	A((V,M,L,I,T))	(P,L,A,T)	1.91913	1.62037
N2	83	7.97156e-05	0.00323645	G(E,D)((K))	E	1.60601	2.70018
N2	85	0.0521156	0.12517	R(K)	R	2.39991	2.83197
N2	86	0.010442	0.05528	(N,D,S,T)	N	1.53146	2.7049
N2	93	0.0718594	0.149678	Q	(N,K,D)	3.30415	1.8059
N2	95	0.0584388	0.132872	T(A)	T	2.4065	2.73007
N2	100	0.0542608	0.12517	F((L))	F	3.2255	3.29826
N2	113	0.0271489	0.0874056	D(G)((N))	D	2.49178	3.06544
N2	116	0.0149859	0.0646411	V(I)	V	2.40723	2.83321
N2	125	0.000761644	0.0140558	(G,S,D)	D	1.62939	3.06543
N2	126	0.00357414	0.0381869	(L,P,T)((H,S))	P((S))	1.68386	3.07986
N2	143	0.0658613	0.143762	E(R,T)((K))	(G,V)((R,T))	1.61146	1.76816
N2	147	0.000760073	0.0140558	G	D((N))	2.60039	2.94069
N2	149	0.0118844	0.0566103	I(S)((A,T))	(S,A,V)((I,T))	1.73176	1.44514
N2	150	0.0323413	0.0990001	H	R	4.01137	2.83202
N2	155	0.00404375	0.0394434	H	Y(H)	3.96373	3.18716
N2	187	0.00977643	0.05528	K(R)	K	2.25747	2.88603
N2	192	0.000344362	0.00873819	V(I)	V	2.47607	2.83321
N2	199	0.0326749	0.0990001	(G,K)((N,R))	K(E)	1.57722	2.26258
N2	206	0.053336	0.12517	I((V))	I	2.58695	2.65703
N2	210	0.0206767	0.0791466	(K,M,I,R,V)((L))	I(V)((K,R))	1.36513	1.84038
N2	212	0.00932176	0.05528	V(A)((T,I))	V	2.08386	2.83221
N2	216	0.00664121	0.047614	(G,V,A)((S))	V(G,S)	1.45011	1.91744
N2	220	0.0524234	0.12517	K(Q)	K(R)	2.4074	2.40291
N2	221	0.082346	0.160733	N	(N,E,K,D)	2.78428	1.47886
N2	234	0.0589088	0.132872	N(S)	N	2.3877	2.78525
N2	238	0.0501224	0.12517	T(A)	T((A))	2.39809	2.63626
N2	257	0.0637924	0.140759	I(V)	I	2.12793	2.65703
N2	267	0.0104145	0.05528	P	(T,K,L,Q)((S))	3.17105	1.37238
N2	275	0.0154671	0.0646411	V(I)	V((I))	2.29656	2.77062
N2	283	0.00088535	0.0149772	R(Q)	R	2.36237	2.83199
N2	284	0.0169874	0.0676166	Y((H))	Y	3.29136	3.50211
N2	286	0.00203341	0.0266168	(I,E,N)((D))	G((D))	1.51059	2.45017
N2	290	0.0918255	0.175854	V	V((I))	2.79318	2.51676
N2	296	0.0749692	0.152187	K(R)	K	2.50478	2.86232
N2	305	0.0542565	0.12517	I((V))	I	2.59442	2.65703
N2	308	0.0272127	0.0874056	(E,V,T,A)	K(T)	1.56981	2.26006
N2	310	0.0155655	0.0646411	Y	H	3.48343	4.01152
N2	311	0.0272613	0.0874056	S((N))	S	2.38179	2.50124
N2	312	0.016984	0.0676166	I((V))	I	2.54881	2.65703
N2	313	0.0248679	0.0873036	D(G)((N,E))	V((A))	1.84472	2.67078
N2	315	0.00605035	0.0472393	G(S,R)((N))	S(R)	1.5348	2.13592
N2	328	4.6519e-05	0.00236084	N	K((R))	2.78527	2.70143
N2	331	0.00248985	0.0280799	(I,R,G,S)	S(R)((N))	1.37942	1.86424
N2	332	0.0457235	0.124278	S	S(F)((Y))	2.48184	2.07355
N2	336	0.0249439	0.0873036	N	H(Y,N)	2.78486	2.71873
N2	338	0.00446896	0.0394434	R(K)	L(Q,W)((K,R))	2.33692	1.79078
N2	342	0.0727763	0.149678	N(E)((D))	N	2.13749	2.78478
N2	347	0.043735	0.124278	P	H(R)((Q))	3.21166	3.26397
N2	356	0.0465278	0.124278	(I,Y,V,D,S)((N))	(I,V,D)	1.20581	1.75366
N2	360	0.0791723	0.158566	(L,V,I)	V	1.64501	2.80952
N2	367	0.0177537	0.0693079	(S,K,E)((N))	S((G,N))	1.4226	2.33779
N2	368	0.0637855	0.140759	(K,D,S,R)((E))	E(D)	1.42966	2.40696
N2	369	0.00546487	0.0462237	D	K(E)	3.06545	2.18458
N2	370	0.0265846	0.0874056	S	L(S)((F))	2.4478	1.74698
N2	378	0.00243415	0.0280799	R(K)	K	2.28933	2.88603
N2	380	0.0711159	0.149678	I(T)((V))	I	1.97369	2.65654
N2	381	1.46019e-05	0.000988059	G((D,N))	E(D)	2.35686	2.4245
N2	384	4.38425e-06	0.000445002	(A,T,I)((V,N,S))	V(I)	1.17806	2.06196
N2	385	0.0210538	0.0791466	(T,I,N)	K(N,R)	1.72693	1.86022
N2	386	2.74483e-06	0.000445002	A((P))	P((S))	2.67523	3.0927
N2	390	0.0275564	0.0874056	S	L(S)	2.50123	2.24202
N2	393	0.0504153	0.12517	N(S)	N	2.24504	2.78525
N2	396	0.006802	0.047614	V(I)	V	2.20694	2.83321
N2	399	0.00668899	0.047614	D	E	3.06483	2.73754
N2	400	0.0356155	0.106323	(N,S,R,G)	R(S)((K))	1.35339	1.99959
N2	401	0.00890518	0.05528	(S,N,D,E)	(D,G,K)((S,N))	1.40975	1.64765
N2	403	0.015603	0.0646411	W(S)	R(M)((S))	2.6323	2.43243
N2	415	0.0538208	0.12517	K((R))	K	2.8201	2.88603
N2	431	0.0415279	0.122176	P	K(N)((S,E,Q))	3.21141	1.95511
N2	435	0.0154956	0.0646411	R	E((K))	2.83147	2.48297
N2	437	0.0266027	0.0874056	W	L	3.9489	2.62824
N2	445	0.0106203	0.05528	V((A))	V	2.64729	2.8081
N2	466	0.00890551	0.05528	F	L	3.29826	2.62821
NP	16	0.0465912	0.185352	(S,G,D)	D((G))	1.60634	2.65237
NP	31	0.0140662	0.111918	R	R(K)	2.83197	2.16883
NP	34	0.0422315	0.179729	G(S,V)((D))	G(D)((S,N))	1.55297	1.82849
NP	61	0.00510607	0.0552661	I((M))	L((I,M))	2.52454	2.23045
NP	67	0.0366489	0.176421	V((I))	V	2.72962	2.83321
NP	77	0.000136518	0.00832763	R(K)	K(R)	2.43457	2.52273
NP	84	0.0420741	0.179729	S(N)	S	2.17831	2.50124
NP	100	0.031077	0.167268	R((I))	V((I))	2.70516	2.5634
NP	101	1.88456e-07	3.44874e-05	(E,D,N)	G(N)((D))	1.90237	1.95674
NP	102	0.000359704	0.0131652	G	G((R))	2.60038	2.4418
NP	103	0.01743	0.131187	K	K(R)	2.88603	2.42388
NP	105	0.0447653	0.182045	V(M)((I,T))	M(V,I,T)	2.02907	1.97652
NP	131	0.000270575	0.0123788	A	A(R)	2.90517	2.5128
NP	136	0.000629748	0.0192073	(L,M,I)	I(M)	1.91099	2.31628
NP	214	0.0295491	0.167268	R(K)	K((R))	2.43182	2.68942
NP	217	0.0409376	0.179729	I((T,V))	(S,I,G)((N))	2.39689	1.49309
NP	236	0.00986349	0.0902509	R((K))	K(R)	2.776	2.44937
NP	283	0.00347309	0.0488904	L	P	2.62821	3.2116
NP	285	0.0266291	0.163969	V	V((I))	2.83321	2.74952
NP	286	0.00614842	0.0625089	A	S	2.9039	2.50112
NP	290	0.0245321	0.161147	D((N))	D((A,G,N))	2.98768	2.34622
NP	305	0.00141585	0.0323875	R(K)	K((R))	2.43484	2.80416
NP	313	0.0112951	0.098429	F(L,S)	Y((F))	1.998	3.21429
NP	329	0.0132649	0.11034	V(I)	V	2.21608	2.83321
NP	335	0.000962472	0.0251618	S	S((F))	2.50126	2.38072
NP	343	0.00431069	0.0525904	V	L	2.8332	2.62819
NP	353	0.00310129	0.0472947	(V,I,L)((A))	(C,S,F,L)((I,V))	1.45077	1.47794
NP	357	0.00196392	0.0359397	Q	K((R))	3.28837	2.65275
NP	373	0.0323469	0.169128	A(T)	A(N)((S,T))	2.13655	1.92987
NP	375	0.000126299	0.00832763	(V,D,E,G)((S,N))	G(V)((E))	1.29866	1.97003
NP	400	0.037598	0.176421	R((K))	K(R)	2.61173	2.26478
NP	411	0.00384014	0.0501961	T	T(A)	2.73007	2.26996
NP	421	0.0408572	0.179729	E	E(D)	2.73754	2.20719
NP	422	0.0365883	0.176421	R	K((R))	2.81195	2.56621
NP	423	0.0268801	0.163969	A((S,T))	(P,S,T,A)	2.5897	1.69382
NP	425	0.00187714	0.0359397	I	I(V)	2.65703	2.10924
NP	430	0.0302651	0.167268	T(A,K)((I))	(N,A,I,S)((T))	1.69639	1.26274
NP	442	0.0480945	0.187261	T((A))	A((T))	2.47915	2.66197
NP	447	0.00513401	0.0552661	M	(M,I,L)	3.4966	2.01883
NP	455	0.0243026	0.161147	D((N))	E(D)	3.00573	2.37933
NP	459	0.0339454	0.172556	Q	R	3.34048	2.8314
NP	470	0.0078021	0.0751465	K	R	2.88603	2.83182
NP	472	0.00253588	0.0421879	T	T(A)	2.73007	2.31205
NP	480	0.0246564	0.161147	D	D(E)	3.04321	2.53534
NP	483	0.0445122	0.182045	N(K)	N	2.24626	2.78527
NP	496	0.0297514	0.167268	Y(F)	Y	2.85233	3.50208
NP	497	0.0179218	0.131187	D(E)((A))	D	2.40459	3.01367
NS1	4	0.00684526	0.110178	N	I(H)((N))	2.75781	2.15587
NS1	22	0.00361759	0.0791347	(L,F,I,V)	V	1.51059	2.78418
NS1	41	0.00308623	0.0791347	K((R))	K(R)	2.81541	2.1963
NS1	53	0.0033967	0.0791347	D	D(N)	3.01536	2.24013
NS1	67	0.00530105	0.103076	(D,R,G)((Q,P,E,W,N))	(N,D,K)	1.33933	1.84984
NS1	70	0.012739	0.131137	K(E,R)((D))	K	1.69747	2.88603
NS1	81	0.000507805	0.0291004	I(T)((V,M))	M((V))	1.93231	3.39287
NS1	82	0.0106236	0.116195	A((T))	A(V,T)	2.78899	1.9158
NS1	84	0.000483928	0.0291004	(V,M,G,S)((L,A,I,T))	T(A)((V))	1.16945	1.96806
NS1	104	0.00939558	0.110178	M	M((I))	3.49714	3.31537
NS1	105	0.00944381	0.110178	L	L((V))	2.62819	2.48333
NS1	112	0.00148852	0.0520981	(T,I,A)((V))	(E,S,V,I)	1.51575	1.32816
NS1	114	0.0146077	0.142019	P(S)((G))	P	2.08064	3.15692
NS1	115	0.00705977	0.110178	L	L((F))	2.62821	2.50607
NS1	127	0.00787434	0.110178	(T,N)((K,A,R,D,S))	N((K,S,D))	1.32484	2.34624
NS1	129	0.0184615	0.157094	T(I)((M,V))	(M,I,T)	1.86951	2.00039
NS1	196	0.0188513	0.157094	E	K(E)	2.69968	2.13189
NS1	202	0.00866255	0.110178	A(T)	A((S))	2.30206	2.79774
NS1	211	0.0183604	0.157094	R(G)	G((R))	2.19529	2.30739
NS1	215	8.84393e-06	0.00154769	(P,S,L)((T,A))	T((P))	1.65204	2.59949
NS1	227	0.000665152	0.0291004	E((G,K))	R(G)((E))	2.43129	2.192
PA	55	0.00124442	0.0818204	D	N((D))	3.01526	2.70334
PA	337	0.000988688	0.0818204	(A,T,V)	S((T))	1.76304	2.43471
PA	356	0.000266174	0.0350019	K((R))	R((K))	2.69986	2.6765
PA	397	0.00299286	0.157424	E	E((G))	2.73752	2.59471
PA	552	0.000194161	0.0350019	T	S	2.73005	2.50124
PB1	52	0.000409841	0.0322409	K((R))	R(K)	2.74012	2.16599
PB1	171	0.00462729	0.167565	M((V))	M(I)((L))	3.249	2.48815
PB1	213	0.00697671	0.171535	N((S,K,T))	N(D)((K))	2.48345	2.13406
PB1	215	0.00568018	0.167565	R(K)	R((K))	2.16714	2.70333
PB1	298	0.00145805	0.0860248	L((V))	I(L)	2.54262	2.1373
PB1	327	0.00525971	0.167565	R	K(R)	2.80915	2.2009
PB1	469	0.00566032	0.167565	T	T(I)	2.70713	2.10806
PB1	517	0.000363282	0.0322409	I((V))	V(I)	2.57884	2.05599
PB1	584	7.66866e-07	0.00018098	R((H))	Q(H)	2.73084	2.92559
PB1	667	0.00726842	0.171535	I((T,V))	(I,T,V)	2.30333	1.66985
PB2	44	0.000618466	0.023325	A(S)	L(S)	2.53243	2.14928
PB2	81	0.00308302	0.0581369	T(A)((I))	V(M)((I))	2.08675	2.26388
PB2	105	9.67774e-05	0.0127746	T(A)((I,M))	V(M)((I))	2.01173	2.42189
PB2	111	0.00889357	0.130439	Y	H((Y))	3.50211	3.80786
PB2	143	0.00757554	0.117644	R	Q	2.83193	3.34047
PB2	199	0.000278258	0.023325	A	S	2.88319	2.50124
PB2	290	0.0121783	0.153099	G	G((R))	2.60038	2.48124
PB2	395	0.00402437	0.0708288	A	V	2.90517	2.83322
PB2	453	0.0115577	0.153099	P((S,T))	H(P,S)((Q))	2.71517	2.64604
PB2	475	0.000546447	0.023325	L((M))	M	2.51321	3.49714
PB2	493	0.00177647	0.0390822	R((K))	K((R))	2.52738	2.69999
PB2	522	0.0147805	0.177366	Q	Q((H))	3.34054	3.24908
PB2	537	0.0118999	0.153099	W	W((R))	3.95012	3.79482
PB2	569	0.00238777	0.0484901	T((A))	A((S))	2.51026	2.69335
PB2	613	0.00111384	0.0352369	V(A)((I))	T(I,A)	2.33345	1.8235
PB2	627	0.00120126	0.0352369	E(K)	K	2.20361	2.88603
PB2	655	0.00433557	0.0715369	V(A)	I(V)	2.27207	2.23656
PB2	661	0.000590805	0.023325	A(T)((V))	T((V))	2.28229	2.50981
PB2	682	0.00148	0.0379413	G	S(N)	2.59988	1.94362
PB2	684	7.62794e-05	0.0127746	A((T))	S(T)	2.69082	1.94702
PB2	702	0.00158089	0.0379413	K(R)	R	2.41675	2.77983
PB2	740	0.000382694	0.023325	D	D(N)	3.02801	2.23774
